# Supplementary material for: A Pilot Study Exploiting the Industrialization Potential of Solid Lipid Nanoparticle-Based Metered-Dose Inhalers
Source: Pharmaceutics. 2023 Mar 7;15(3):866. doi: 10.3390/pharmaceutics15030866 (PMC10052976; doi:10.3390/pharmaceutics15030866)
Supplement: Supplementary file 1 [file pharmaceutics-15-00866-s001.zip › pharmaceutics-2214257-supplementary.pdf]

## Supplementary Materials

# A Pilot Study Exploiting the Industrialization Potential of Solid Lipid Nanoparticle based Metered-Dose Inhalers

Lei Shu<sup>1,†</sup>, Wenhua Wang<sup>2,†</sup>, Chon-iong Ng<sup>1</sup>, Xuejuan Zhang<sup>1,\*</sup>, Ying Huang<sup>1</sup>, Chuanbin Wu<sup>1</sup>, Xin Pan<sup>2</sup> and Zhengwei Huang<sup>1,\*</sup>

<sup>1</sup> College of Pharmacy, Jinan University, Guangzhou 510632, China

<sup>2</sup> School of Pharmaceutical Sciences, Sun Yat-sen University, Guangzhou 510006, China

\* Correspondence: zhangxj0223@jnu.edu.cn (X.Z.); huangzhengw@jnu.edu.cn (Z.H.); Tel.: +86-020-39943117 (Z.H.)

† These authors contributed equally to this work.

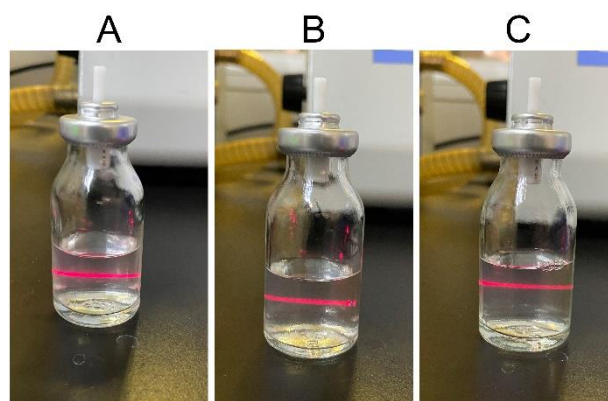

**Figure S1.** Evaluations of SLN-based MDI: Photographs of MDI products based on SLN(0) (A), SLN(+) (B) and SLN(-) (C).

**Table S1.** Qualitative solubility test of palmityl palmitate at room temperature.

| Solvent                     | Phenomenon     | Roughly-estimated solubility (mg·mL <sup>-1</sup> )* |
|-----------------------------|----------------|------------------------------------------------------|
| Water                       | Insoluble      | << 1                                                 |
| Ethanol                     | Insoluble      | << 1                                                 |
| N,N-Dimethylformamide (DMF) | Insoluble      | << 1                                                 |
| Dimethyl sulfoxide (DMSO)   | Insoluble      | << 1                                                 |
| Ethyl acetate               | Soluble        | > 5                                                  |
| Acetone                     | Soluble        | > 5                                                  |
| Dichloride methane          | Easily soluble | >> 10                                                |
| Trichloride methane         | Easily soluble | >> 10                                                |

\* The value was roughly determined by the following procedures: (1) Add a certain weight of palmityl palmitate into the solvent; (2) Vortex for 1 min and allowed for equilibrium for 24 h; (3) Observe whether the solid was dissolved; (4) Estimate the solubility.
